# Supplementary material
Source: PubMed Central journal article supplement (PMC4150315)

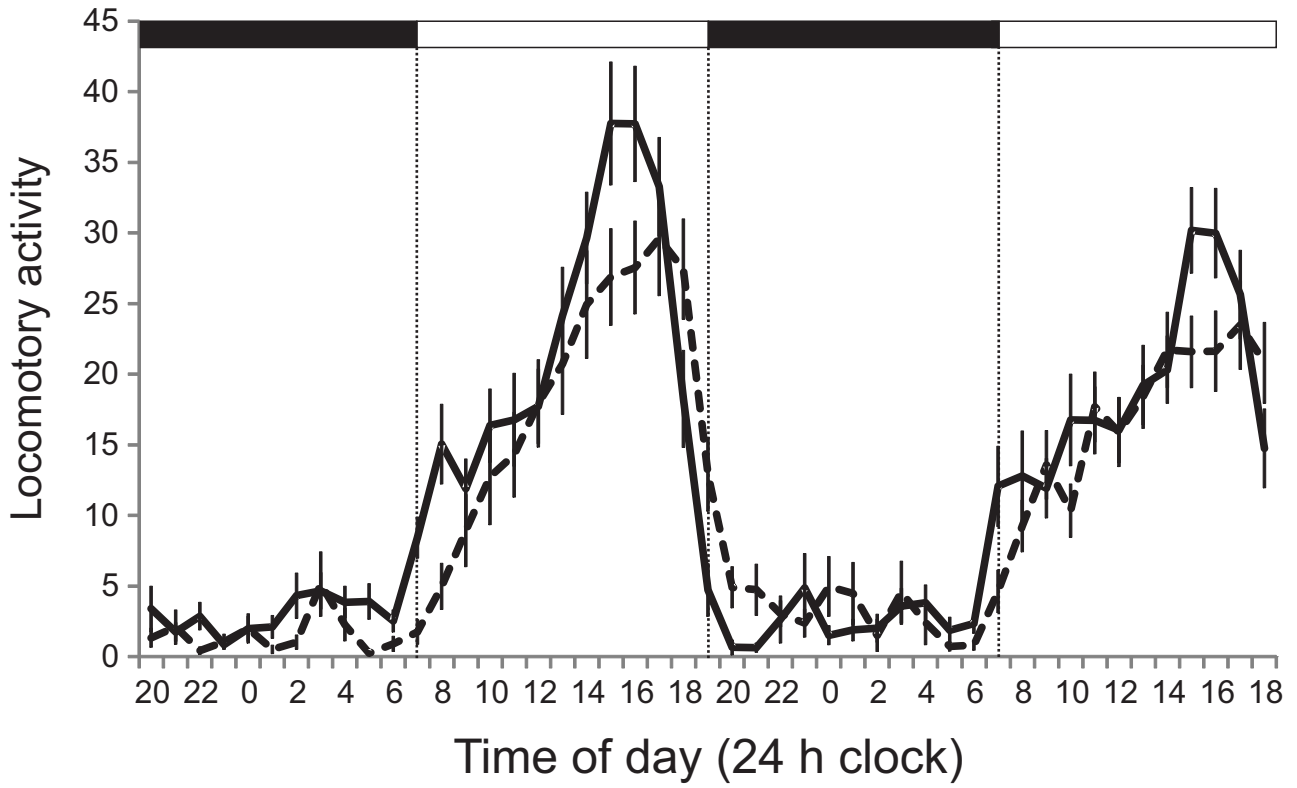

Supplement: rspb20140821supp2.pdf [file rspb20140821supp2.pdf]

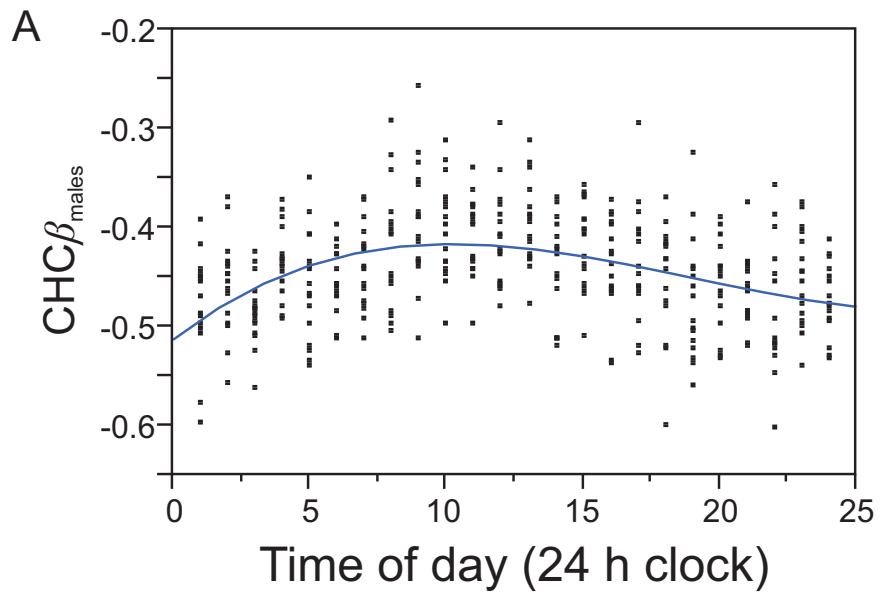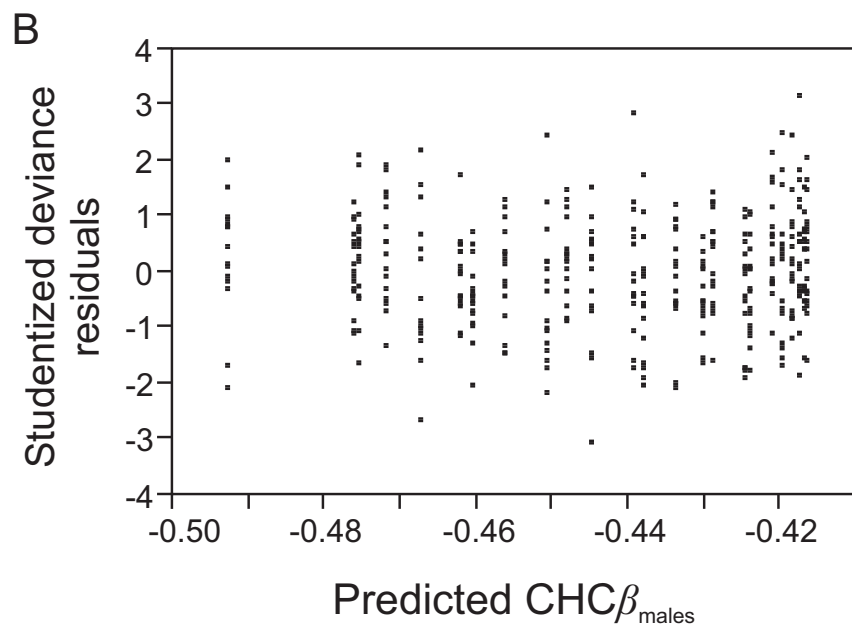

Supplement: rspb20140821supp3.pdf [file rspb20140821supp3.pdf]

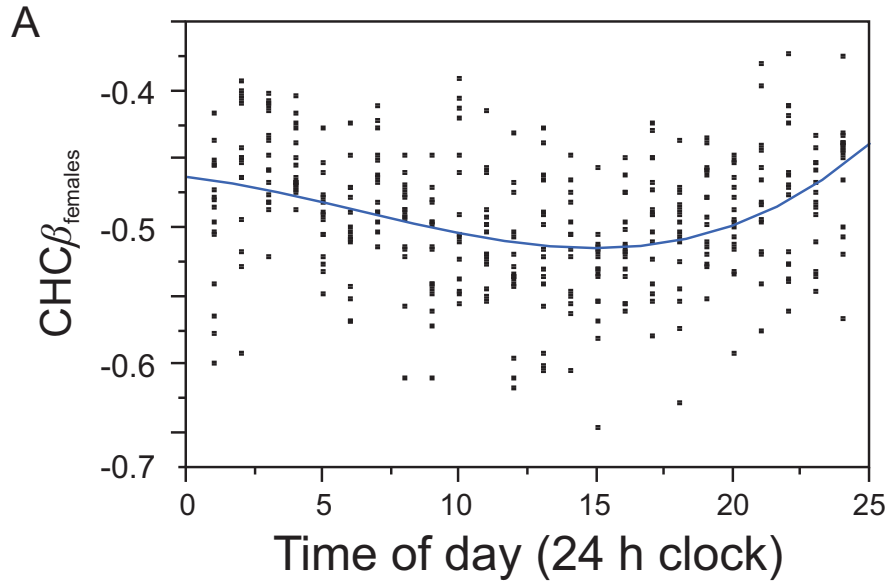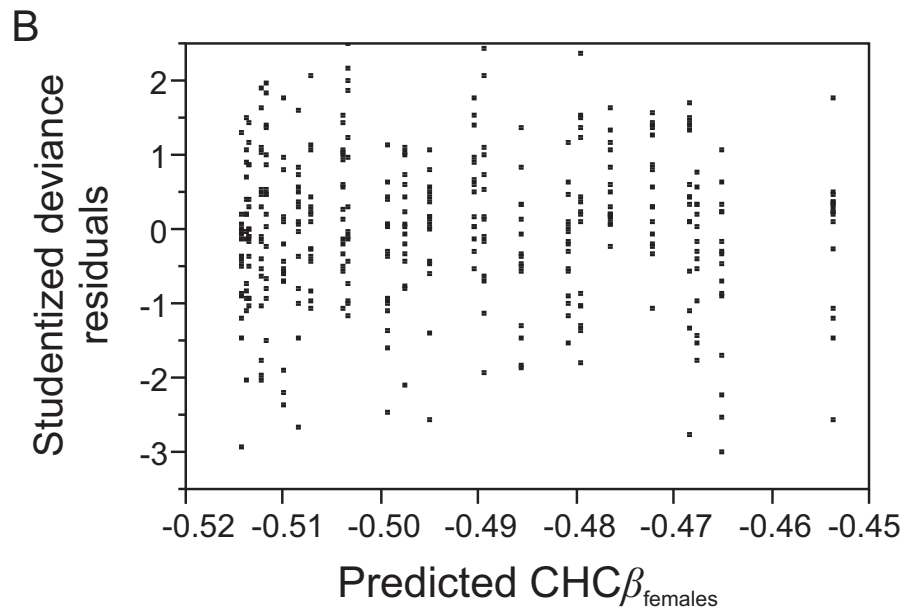

Supplement: rspb20140821supp4.pdf [file rspb20140821supp4.pdf]
